# Supplementary material for: Identification of “regulation of RhoA activity panel” as a prognostic and predictive biomarker for gastric cancer
Source: publisher site journal article supplement (doi:10.18632/aging.202179), 2020-12-03
Supplement: Supplementary file [file aging-v13i1-202179-supplementary-material-SD3.pdf]

## SUPPLEMENTARY TABLES

Please browse Full Text version to see the data of Supplementary Table 1.

**Supplementary Table 1. Genes contained in the RRAP biomarker gene set and their mutation frequency in the TCGA training, TCGA validation, and CGC cohorts, along with migration activity.**

**Supplementary Table 2. The CLDN11, CLDN6, CLDN9, VTN, and F2 with cell migration activity.**

| Symbol | Conclusion                                                                                                                                                                                                                                                                                                               | Experiment model                                             | PMID                                   |
|--------|--------------------------------------------------------------------------------------------------------------------------------------------------------------------------------------------------------------------------------------------------------------------------------------------------------------------------|--------------------------------------------------------------|----------------------------------------|
| CLDN6  | Higher <b>CLDN6</b> expression promotes the cell proliferation and migration ability of gastric cancer. Increased expression of <b>CLDN6</b> predicts poor prognosis in gastric cancer patients.                                                                                                                         | MKN28, AGS, MKN7, NUGC-3, xenograft subcutaneous tumor model | 31827075, 20874001, 27914788, 31654186 |
| CLDN9  | <b>CLDN9</b> overexpression in gastric adenocarcinoma cells has been reported to increase cell migration and proliferation. The expression of <b>CLDN9</b> in gastric cancer correlates to poor prognosis. Higher <b>CLDN9</b> expression promotes invasiveness of several solid tumors in vitro and metastasis in vivo. | AGS, HL7702, a spontaneous metastasis model                  | 20874001, 29031421, 31418417, 26669782 |
| CLDN11 | Silencing of <b>CLDN11</b> is associated with increased invasiveness, proliferation, and migration of gastric cancer cells. DNA hypermethylation is associated with the downregulation of <b>CLDN11</b> in gastric cancer cells.                                                                                         | MKN28, MKN74, AGS, HFE145                                    | 32119960, 28962204, 19956721           |
| F2     | <b>F2</b> is generated in the TME, promoting the migration and metastasis of tumor cells.                                                                                                                                                                                                                                | B16, HT29-D4, SUM149, MC38 cells                             | 30654498, 15539922, 12707033, 23280128 |
| VTN    | Decreased expression of <b>VTN</b> promotes gastric cancer cell growth and metastasis. <b>VTN</b> is related to the migration and invasion of other solid tumors, such as ovarian adenocarcinoma, fibrosarcoma and nasopharyngeal carcinoma.                                                                             | AGS, IGROV1, HT-1080,5-8F, HNE2, HONE1 cells                 | 25789040, 9935212, 16052409, 29123267  |

**Supplementary Table 3. Clinical characteristics in TCGA-training, TCGA-validation, and CGC cohorts.<sup>a</sup>**

| <b>Characteristic</b>           | <b>TCGA- training<br/>(N=160)</b> | <b>TCGA-validation<br/>(N=155)</b> | <b>CGC<br/>(N=109)</b> |
|---------------------------------|-----------------------------------|------------------------------------|------------------------|
| Age, years                      |                                   |                                    |                        |
| Mean (SD)                       | 64.3 (10.8)                       | 66.2 (9.9)                         | 57.9 (13.0)            |
| Median (Q1 – Q3)                | 66 (57-72)                        | 68 (58-73)                         | 58 (51-67)             |
| Min – Max                       | 30-84                             | 43-90                              | 25-83                  |
| Gender - no. (%)                |                                   |                                    |                        |
| Male                            | 107 (66.9%)                       | 96 (61.9%)                         | 77 (70.6%)             |
| Female                          | 53 (33.1%)                        | 59 (38.1%)                         | 32 (29.4%)             |
| AJCC Stage - no. (%)            |                                   |                                    |                        |
| II                              | 65 (40.6%)                        | 65 (41.9%)                         | 43 (39.4%)             |
| III                             | 95 (59.4%)                        | 90 (58.1%)                         | 66 (60.6%)             |
| Lauren classification - no. (%) |                                   |                                    |                        |
| Diffuse                         | 27 (16.9%)                        | 30 (19.4%)                         | 61 (56.0%)             |
| Intestinal                      | 72 (45.0%)                        | 64 (41.3%)                         | 48 (44.0%)             |
| Unknown                         | 61 (38.1%)                        | 61 (39.3%)                         | —                      |
| Tumor location - no. (%)        |                                   |                                    |                        |
| Gastroesophageal junction       | 33 (21.0%)                        | 31 (20.0%)                         | 34 (31.2%)             |
| Non-gastroesophageal junction   | 123 (76.9%)                       | 121 (78.1%)                        | 75 (68.8%)             |
| Unknown                         | 4 (3.0%)                          | 3 (2.0%)                           | —                      |
| Adjuvant chemotherapy - no. (%) |                                   |                                    |                        |
| Yes                             | 81 (50.6%)                        | 70 (45.2%)                         | 98 (90.0%)             |
| No                              | —                                 | —                                  | 8 (7.3%)               |
| Unknown                         | 79 (49.4%)                        | 85 (54.8%)                         | 3 (2.7%)               |

<sup>a</sup>Because of rounding, percentages may not total 100.
