# Supplementary material for: Identification of “regulation of RhoA activity panel” as a prognostic and predictive biomarker for gastric cancer
Source: Aging (Albany NY). 2020 Dec 3;13(1):714–34. doi: 10.18632/aging.202179 (PMC7835016; doi:10.18632/aging.202179)
Supplement: Supplementary Table 1 [file aging-13-202179-s002.xlsx]

## Sheet: Sheet1
Supplementary Table 1. Genes contained in the RRAP biomarker gene set and their mutation frequency in the TCGA training, TCGA validation, and CGC cohorts, along with migration activity.
Gene symbol	Entrez gene name	Ensembl ID	Refseq accession	Mutation frequency (%)			Experiment model	Conclusion	PMID
				TCGA- training cohort	TCGA-validation cohort	CGC cohort
				(N = 160)	(N = 155)	(N = 109)
ARHGAP32	Rho GTPase activating protein 32	ENSG00000134909	NM_014715	0.019	0.077	0.018	AGS, MKN45, neuron cells and mice model	ARHGAP32 is a neuron-associated GTPase-activating protein, and RhoA is a direct substrate of ARHGAP32. ARHGAP32 knockdown results in impaired migration in vitro and in vivo.	32205841, 23226367, 29118714, 20550964
ARHGAP4	Rho GTPase activating protein 4	ENSG00000089820	NM_001666	0.006	0.006	0.018	NIH 3T3, BxPC-3, SW1990, PANC-1	ARHGAP4 encodes a member of the rhoGAP family of proteins, which play a role in the regulation of small GTP-binding proteins belonging to the RAS superfamily. It was found to localize to the leading edge of migrating cells and in growth cones, implicating a role in cell migration. ARHGAP4 overexpression inhibits cell migration and metastasis in vitro and in vivo.	30151649, 17804252, 30958531, 32021284, 31303760
ARHGAP6	Rho GTPase activating protein 6	ENSG00000047648	NM_013427	0.025	0.039	0	A549, H1299, HeLa, SiHa, CaSki, C4-1	ARHGAP6 plays a crucial role in regulating actin polymerization in several cellular processes and is thought to have two independent functions, one as a GTPase-activating protein with specificity for RhoA, and another as a cytoskeletal protein that promotes actin remodeling. ARHGAP6 aberrations contribute to the invasive phenotype of diffuse gastric cancer. The upregulation of ARHGAP6 inhibits th…	9417914, 10699171, 8570618, 25079317, 30816546, 26628301
ARHGAP9	Rho GTPase activating protein 9	ENSG00000123329	NM_032496	0.012	0.039	0.018	SGC7901, MCF-7, MDA-MB-231, HepG2, MHCC-97H, MHCC-97L	ARHGAP9 encodes a member of the Rho-GAP family of GTPase-activating proteins. ARHGAP9 siRNA inhibits cell viability, migration and invasion in gastric cancer. ARHGAP9 knockdown inhibits the proliferation, migration, and invasion of breast cancer. However, the overexpression of ARHGAP9 suppresses the migration of hepatocellular carcinoma cells and suppresses in vivo lung metastasis.	31966562, 29905031, 30206221, 30655855, 31897161
ARHGEF17	Rho guanine nucleotide exchange factor 17	ENSG00000110237	NM_014786	0.038	0.077	0.037	MCF-10A, MDCK, HUVEC	ARHGEF17 is a Rho-specific guanine nucleotide exchange factor that is linked to the regulation of actin structure and to migration by inhibiting actomyosin contractility at the leading edge of a moving cell. ARHGEF17 silencing inhibits cell motility. Moreover, ARHGEF17 promotes the activation of RhoC, which in turn promotes persistent cell migration.	22911862, 23729734, 23825001
ARHGEF2	Rho/Rac guanine nucleotide exchange factor 2	ENSG00000116584	NM_004723	0.031	0.026	0.009	MDA-MB-231, HeLa, Sf9, COS-7, NIH 3T3, MDCK, ARHGEF2 mutant mice	ARHGEF2 catalyzes the replacement of GDP to GTP bound to Rho-related proteins and thereby controls the timing and localization of the activation of Rho GTPases such as RhoA. ARHGEF2 overexpression plays a role in promoting cell migration and invasion.	22002306, 19625450, 9857026, 11912491, 20089843, 28453519
ARHGEF3	Rho guanine nucleotide exchange factor 3	ENSG00000163947	NM_019555	0.025	0.013	0	NIH 3T3 fibroblasts, CNE2, SUNE1	ARHGEF3 encodes a guanine nucleotide exchange factor, which specifically activates two members of the Rho GTPase family: RhoA and RhoB. It stimulates the assembly of stress fibers and focal adhesions in a Rho kinase-dependent manner. ARHGEF3 knockdown suppresses cell growth, migration, and invasion in vitro.	12221096, 27028992
BCR	BCR activator of RhoGEF and GTPase	ENSG00000186716	NM_004327	0.012	0.052	0	Astrocytes, normal human epidermal keratinocytes, human umbilical vein endothelial cells	BCR is a GTPase-activating protein for p21rac and other kinases. Bcr controls polarized cell migration by locally restricting both Rac1 (a key regulator of cell migration) and PKCζ (a key regulator of cell polarization) function. Bcr also regulates stress fibers and focal adhesion formation. Moreover, it increases in vitro angiogenesis.	24152735, 23940119, 25631082
CDC42	cell division cycle 42	ENSG00000070831	NM_001791	0.012	0.006	0	MKN-45, AGS, SGC7901, SGC-7901NM, GSU, MKN7, mammary epithelial cell	The protein encoded by CDC42 is a small GTPase of the Rho subfamily. This subfamily regulates signaling pathways that control diverse cellular functions, including cell morphology, migration, endocytosis and cell cycle progression. CDC42 activation promotes cell motility and invasion in gastric cancer.	22337890, 26549550, 29587866, 20600540, 20963626, 32029704, 24074261
CDKN1B	cyclin dependent kinase inhibitor 1B	ENSG00000111276	NM_004064	0.006	0.006	0	SGC7901, MGC803, 143B cells, MEF, glioblastoma cells, U‐2OS	CDKN1B encodes a cyclin-dependent kinase inhibitor that shares limited similarity with CDK inhibitor CDKN1A/p21. CDKN1B downregulation decreases the cell apoptosis rate and cell migration and invasion.	23333463, 30992462, 15078817, 30582227
DLEC1	DLEC1 cilia and flagella associated protein	ENSG00000008226	NM_007337	0.038	0.077	0.018	PrCa cells, DU145 cells, MCF-7, MDA-MB-231, H1299, A549	The cytogenetic location of DLEC1 is 3p21.3, and it is located in a region that is commonly deleted in a variety of malignancies. Reducing DLEC1 increases proliferation, migration and invasion.	25648635, 28130753, 29113240
FARP1	FERM, ARH/RhoGEF and pleckstrin domain protein 1	ENSG00000152767	NM_005766	0.031	0.058	0.009	MKN45, MKN74, MKN7, GSU, A-375 cells	FARP1 encodes a protein containing a FERM (4.2, exrin, radixin, moesin) domain, a Dbl homology domain, and two pleckstrin homology domains. These domains are found in guanine nucleotide exchange factors and proteins that link the cytoskeleton to the cell membrane. In gastric cancer cells, FARP1 knockdown decreases cell motility, whereas FARP1 overexpression promotes migration via CDC42 activation…	32029704, 31021836
NET1	neuroepithelial cell transforming 1	ENSG00000173848	NM_005863	0.006	0.013	0.018	AGS, SGC-7901, MKN45, OAC	NET1 is part of the family of Rho guanine nucleotide exchange factors. Members of this family activate Rho proteins by catalyzing the exchange of GDP for GTP. NET1 overexpression activates RhoA, leading to cell invasion and migration in gastric cancer. NET1 knockdown results in the reduced cell proliferation and migration of other solid tumors	21284875, 18827818, 31451992, 23945136
NGEF	neuronal guanine nucleotide exchange factor	ENSG00000066248	NM_019850	0.006	0.019	0.009	Fibroblasts, P6 or E21 retina ganglion cells, chick retina	NGEF, also known as ARHGEF27, activates RhoA, Cdc42, and Rac1. It plays a role in the highly localized regulation of growth cone motility.	11336673, 15848799, 15254079
OBSCN	obscurin, cytoskeletal calmodulin and titin-interacting RhoGEF	ENSG00000154358	NM_052843	0.131	0.239	0.128	Human primary myoblasts, COS-7, MCF10A	OBSCN is a sarcomeric giant protein and localizes mainly to the M-band in mature myofibrils. It was proved that the rho-guanine nucleotide exchange factor domain of obscurin activates RhoA signaling. Reducing OBSCN, leading to enhanced tumorigenesis, migration and invasiveness.	11448995, 19258391, 19605563, 25381817
PRPF38B	pre-mRNA processing factor 38B	ENSG00000134186	NM_018061	0	0.013	0		PRPF38B are related to the pre-mRNA splicing factor, and PRPF38B expression was associated with breast tumour aggressive phenotypes including ER-negative, PR-negative, HER-overexpression, high pleomorphism and high tumour grade.	29348822
RHOA	ras homolog family member A	ENSG00000067560	NM_001664	0.075	0.045	0.037	MKN45, SGC7901, AGS, MGC803, BGC823, GES-1, NE-4C, MDA-MB-231, MCF-7, MKN1	RICS/RhoA signaling is associated with modulating cancer progression, and activing the signaling could lead to suppress gastric cancer metastasis. Activating RHOA/ROCK2 signalling pathway could promote neural stem cell migration. RhoA activation was involved in gastric cancer cell migration.	32205841, 30091500, 22655072, 23123500, 27250838
SLC6A5	solute carrier family 6 member 5	ENSG00000165970	NM_004211	0.031	0.006	0	HEK293	SLC6A5 encodes a sodium- and chloride-dependent glycine neurotransmitter transporter. This integral membrane glycoprotein is responsible for the clearance of extracellular glycine during glycine-mediated neurotransmission. This protein is found in glycinergic axons and maintains a high presynaptic pool of neurotransmitter at glycinergic synapses. SLC6A5 (GlyT2) mutation will decrease glycine inta…	16751771
VAV2	vav guanine nucleotide exchange factor 2	ENSG00000160293	NM_001134398	0.012	0.039	0	MDA-MB-231, HUVECs, SK-OV-3.ipl, Astrocyte, BHP17	Suppressing VAV2 activity can inhibit the migration of human cancer cells. VAV2 is required for autocrine VEGF and IL-8-induced Rac1 activation and cell migration, and activating VAV2-mediated Rac1 signaling can lead to tumor cell migration. Activating VAV2 signaling can inhibit Schwann cell migration. Vav2-Rho GTPase stimulates cell migration and metastasis of cancer.	24656238, 28278510, 11606575, 20335460, 27986811
VAV3	vav guanine nucleotide exchange factor 3	ENSG00000134215	NM_006113	0.019	0.026	0.009	MGC803, AGS, C4-2, PC3, LNCaP	The VAV proteins are guanine nucleotide exchange factors for Rho family GTPases that activate pathways leading to actin cytoskeletal rearrangements and transcriptional alterations. VAV3 knockdown inhibits the proliferation, migration, and invasion of gastric cancer cells. VAV3 levels are increased in patients with lymphatic metastasis. Moreover, the expression of VAV3 is correlated with the migra…	24072493, 22544459, 28513273, 22659453
